# Supplementary material for: Quantification of the virus-host interaction in human T lymphotropic virus I infection
Source: PubMed Central journal article supplement (PMC1327681; doi:10.1186/1742-4690-2-75), 2005-12-09

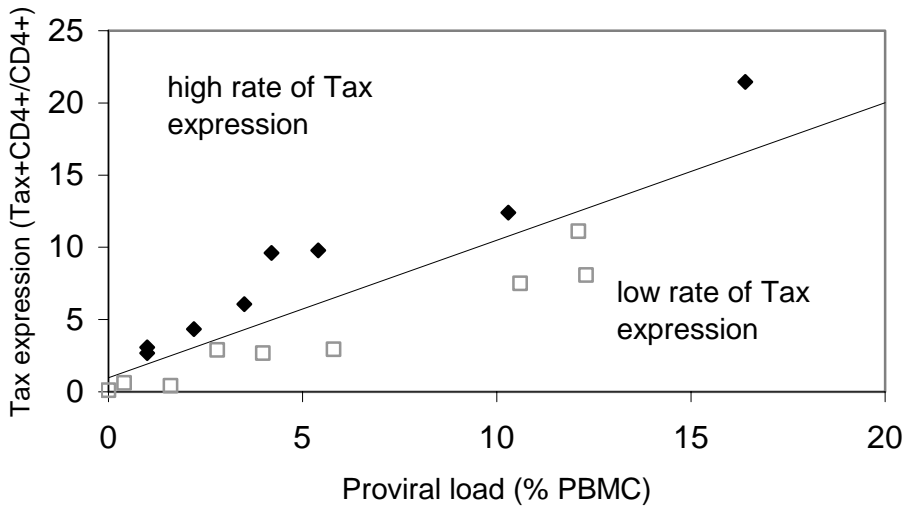

Supplement: 1742-4690-2-75-S2.pdf [file 1742-4690-2-75-S2.pdf]
